# Supplementary material
Source: PubMed Central journal article supplement (PMC2993343)
Supplement: 1007246107_pnas.201007246SI.pdf [file 1007246107_pnas.201007246SI.pdf]

# Supporting Information

Lin et al. 10.1073/pnas.1007246107

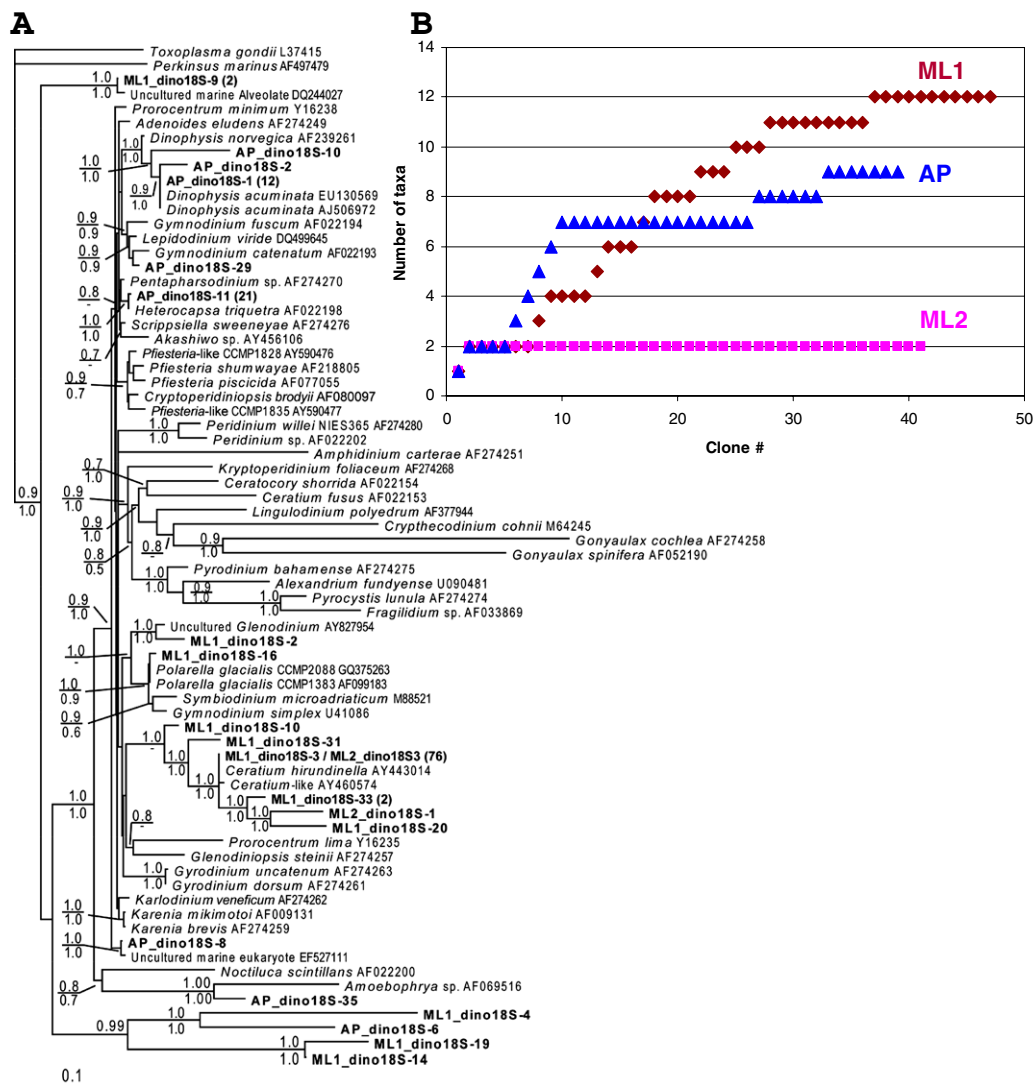

**Fig. S1.** Dinoflagellate diversity in the field samples analyzed in this study. (A) Phylogenetic analysis of the field-retrieved dinoflagellate 18S rDNA sequences (in bold) with documented sequences of dinoflagellates, *Perkinsus marinus*, and apicomplexans (as outgroup). Only unique clones from each sample were included in the analysis, with the number of clones identical to the one shown in the tree given in parentheses. Support of the nodes stemmed from maximum likelihood (ML)/Mr. Bayes analyses (MB). (B) Rarefaction curves of unique dinoflagellate taxa (based on 97% identity cutoff) detected from the sequenced 18S rDNA clone libraries. AP, Avery Point at Long Island Sound; ML1, Mirror Lake sample 1; ML2, Mirror Lake sample 2.

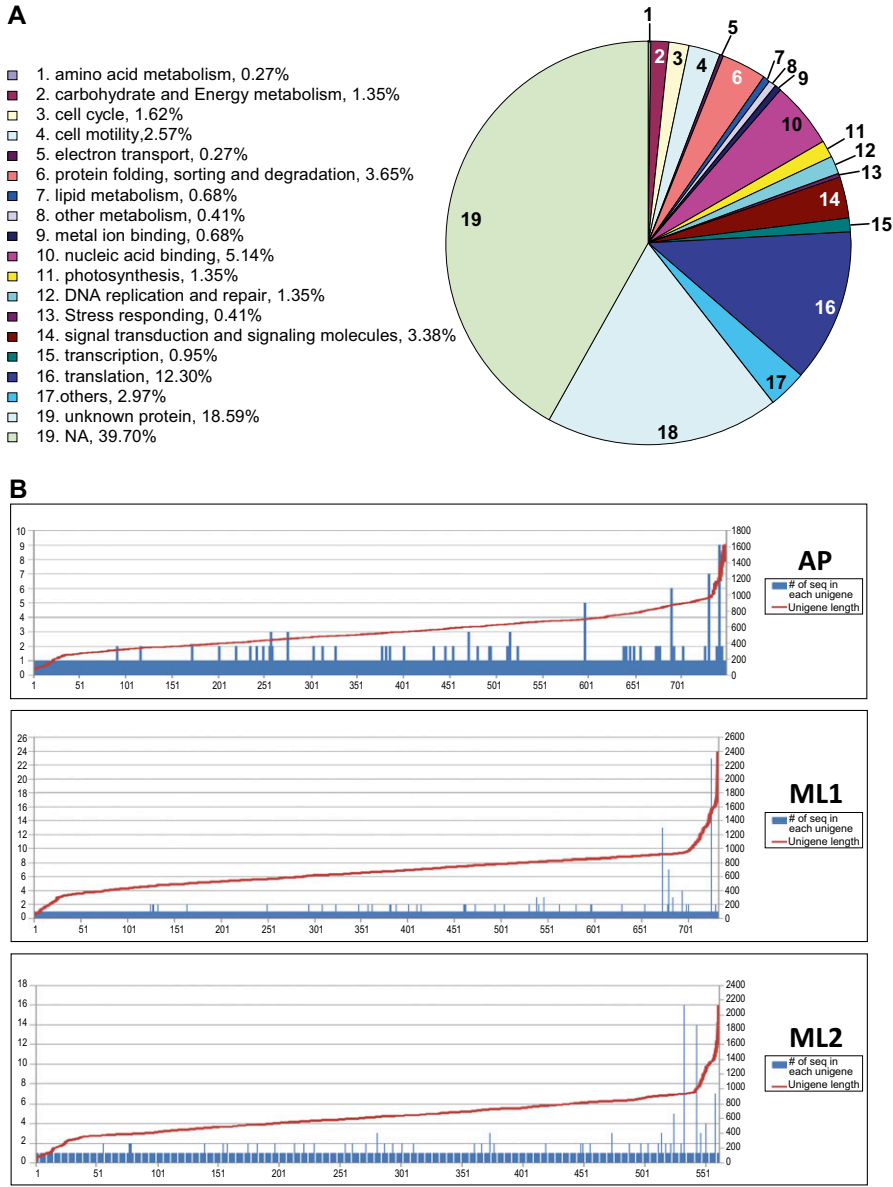

Fig. S2. (A) Diverse cellular processes represented in percentage of the cDNA libraries (e-cDNAs) from the Long Island Sound (AP) sample that had hits in GenBank. Each process is marked by a numeral in the chart; its name and percentage are indicated in the legend. (B) EST representation of each unigene from e-cDNA libraries. Note that the majority of genes were expressed at a homogeneous and low level (1–2 clones).



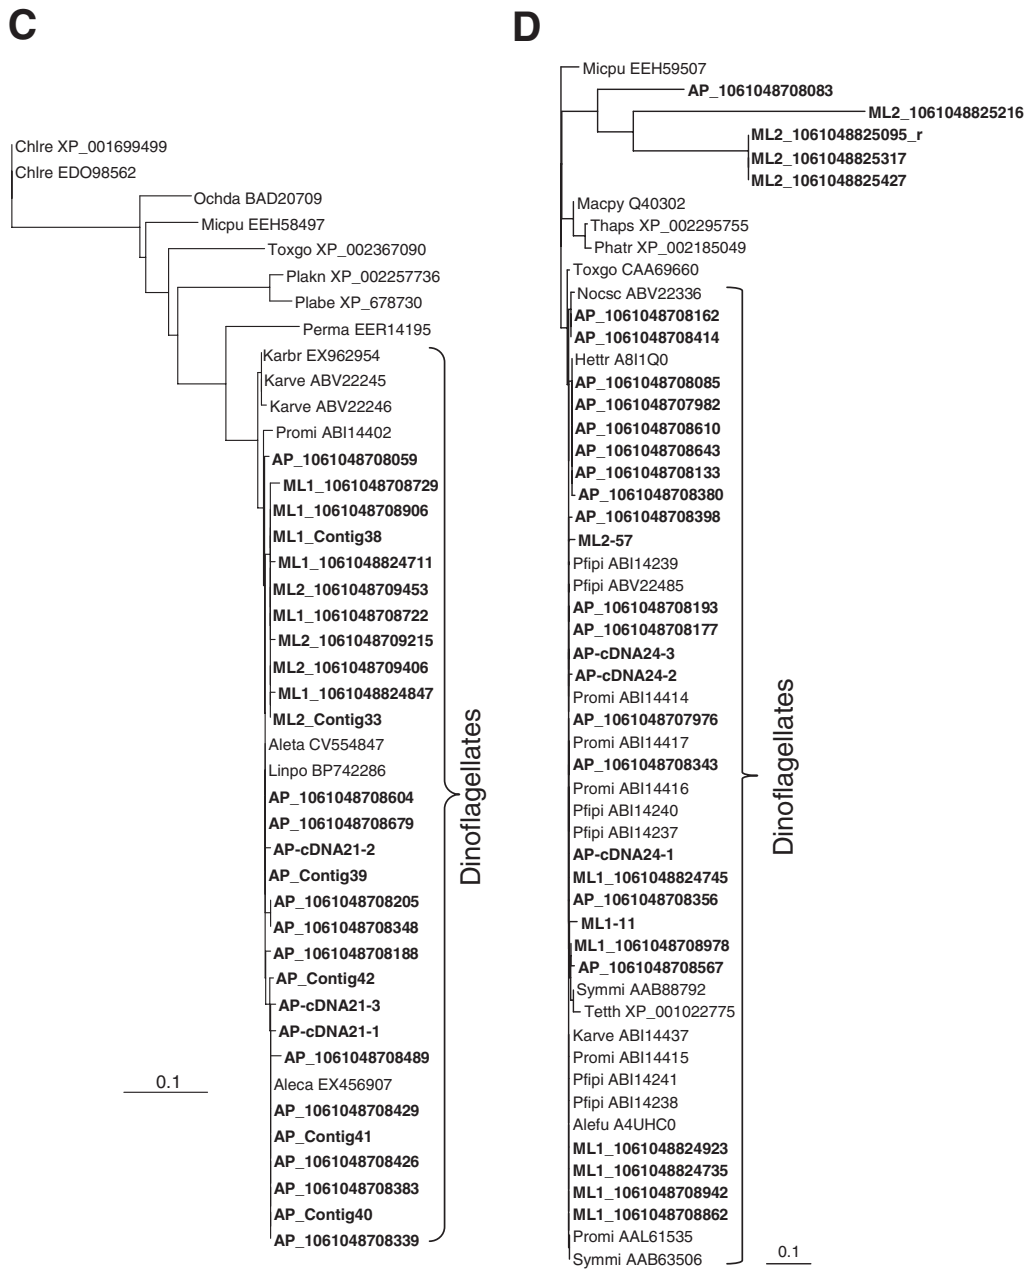

Fig. S3. (Continued)

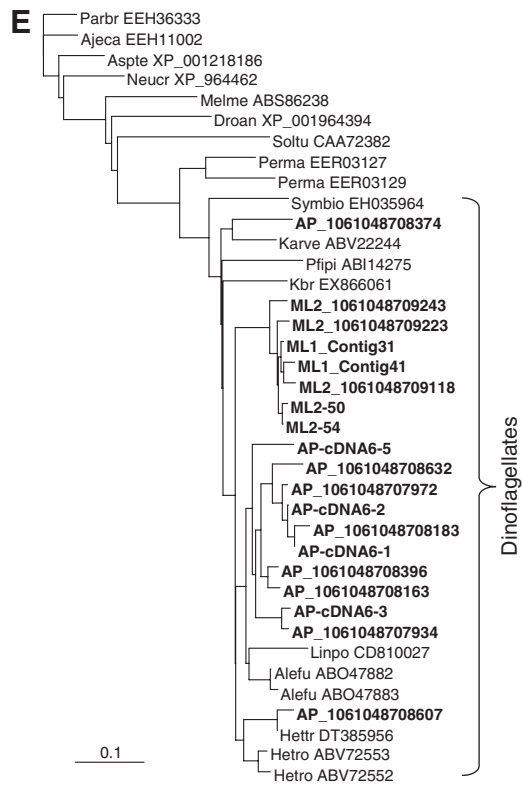

**Fig. S3.** Neighbor-joining (NJ) tree of the five most highly expressed common genes to show affiliation with documented dinoflagellates. Items in bold are from AP, ML1, and ML2. (A) Major basic nuclear protein. (B) Ubiquitin. (C) Centrin. (D) Calmodulin. (E) 14-3-3 protein.

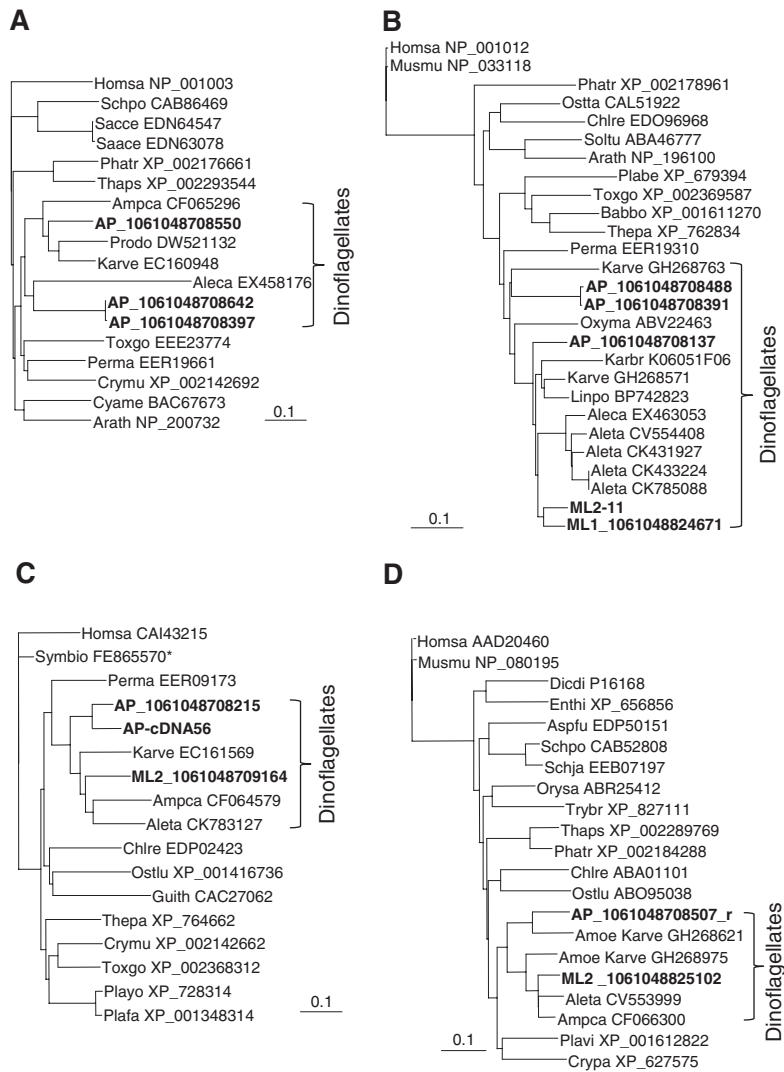

**Fig. S4.** NJ trees of example ribosomal proteins (RPs) found in this study to show affiliation of e-cDNAs (in bold) with dinoflagellates among other organisms. (A) 40S rpS8. (B) 40S rpS17. (C) 60S rpL10. Asterisks depict previously reported as sequence from dinoflagellate symbiont of coral (*Symbiodinium*) but possibly a sequence from coral contamination, which could be prevented by using dinoflagellate spliced-leader (DinoSL) primer. (D) 60S rpL11.



```

AP1  MAPIAEGFSYDQWSAVYNALSFGIAAMGSATVFFWLQIPYVAKGYRTALTITGIWTLIAT
AP2  MAPIAEGFSYDQWSAVYNALSFGIAAMGSATVFFWLQIPNVAKGYRTALTITGIWTLIAT
Aleca MAPIPDGFSYDQWSAVYNALSFGIAAMGSATVFFWLQIPNVSKSYRTALTITGIWTFIAT
Oxyma MAPIPTGDFSYGEMNAVYNALSFGIAAMGSATVFFWLQIPNVTKNYRTALTITGIWTFIAT
Pyr1u MAPIPDGFTYGGQWSLVYNSLSFGIAGMGCATVFFWLQIPNVSKSYRTALTITGLVTAIAT
Octan ----METLSLGGYDLIFNAFSFGFALAAATLFFWLGIGQVKSEYKTALVITGLVTFIAA
KB13 -----MEVGGYNLVYNSLSFAIAIFGAATVFFFAQRSQVAPAYKTALSLSGLVCLFIAT
Salru MLQELPTLTPGQYSLVFNMFSTVATMTASVFFVFLARNNVAPKYRISMMVSALVVFIIAG
      : . : . : * : * : * : . : : * * * * * * * * * * * * * * * * * *
AP1  YHYFRIFNSWTEAFEVTKNSGGGYTVPSPGAPPNDAYRYVDWLLTVPLLLIELILVMKLP
AP2  YHYFRIFNSWTEAFEVTKNSGGGYTVPSPGAPPNDAYRYVDWLLTVPLLLIELILVMKLP
Aleca YHYFRIFNSWVEAFNVNTNSGGGDYTVKLTGAPPNDAYRYVDWLLTVPLLLVELILVMKLP
Oxyma YHYFRIFNSWVEAFVNVN- EVGGAYSVKVSCTPNDAYRYVDWLLTVPLLLIELILVMKLP
Pyr1u YHYFRIFNSWVDAFKVNVNNGGDYTVTLTGAPPNDAYRYVDWLLTVPLLLIELILVMKLP
Octan YHYFRIGQSWVDAYTTLVDGVHVPT----EKAFNSAYRYVDWLLTVPLLLIELILVMSLS
KB13 YHYLRMPFESFNDAYTTLVNGTVEAT----GAQFNDAYRYVDWLLTVPLLLIELILVMSLS
Salru YHYFRITSSWEAAAYALQNGMYQPT----GELFNDAYRYVDWLLTVPLLLTVELVLVMGLP
      * * * * * * * * * * * * * * * * * * * * * * * * * * * * * * *
AP1  ADETSKLSWNLGTAAMVVALGYGPEIQDDLAVR--WQWFLSMIPFSYVVFTLAVGLA
AP2  ADETSKLSWNLGTAAMVVALGYGPEIQDDLAVR--WQWRFLSMIPFCYVVFTLAVGLA
Aleca AEQTTSMWSKLGFSALMVALGYGPEIQDDLTVR--VWVWGLAMIPFCYVVVELVGLGN
Oxyma AGETAALSSTKLGVASAVMVALGYGPEIQENLAVR--WFWWALAMIPFAYVVFSLVGLG
Pyr1u KAETVKLSWNLGVASAVMVALGYGPEIQDDLTVR--WFWWAMAMIPFVVVVTVLVNGLS
Octan RSETVSRATSLGLAALLMVALGYGPEVSDSGGVR--WIFGLSMIPFLWIVFQVYVGLG
KB13 KEETYSKGTKLALAAAVMVALGYGPEVITDPSMYGDRWMMWVLAAMIPFVYIVVDLVSGLG
Salru KNERGPLAAKLGFLAALMIVLGYGPEVSENAALFGTRGLGFLSTIPFVWILYILFTQLG
      : . * . : * : * * * * * * * * * * * * * * * * * * * * * * *
AP1  EATNKQASETAASLVSSARYLTVVANCTYFVWIIKKNVGLAGP----VATTYEQVGYSI
AP2  EATNKQASETAASLVSSARYLTVVANCTYFVWIIKKNVGLAGP----VATTYEQVGYSI
Aleca DATKRQASATVSSLSARYLTVISWCTYFVWIVKNIKGLSGP----TATMYEQVGYSV
Oxyma AATAKQPESVAG-LVSAARYLTVAVSNLTYPFVWIIKKNVGLAGP----TATMYEQVGYSV
Pyr1u DATAKQPD-SVKSLLVTARYLTVISWLTYPFVWIIKKNVGLAGN----IATTYEQVGYSV
Octan KAIESQPE-NARGLVRTARNVTVGNSCFYVWVYFAGAVGLEGP----FATVVVEVGYTI
KB13 ASISKQPK-AVQGLVSKARTLTLISNCFYVWVYFPMIGLQADPG--AVNPAIQVGYTV
Salru DTIQRSS-RVSTLLGNARLLLATNGFYIAAMIPMAFPEAFPSNTPGTIVALQVGYTI
      : * * * * * * * * * * * * * * * * * * * * * * * * * * * * *
AP1  ADVVAKAVFGVLIWAIAAEKSRIEEDGRLRR-----
AP2  ADVVAKAVFGVLIWAIAAEKSRIEEDSFCVAVSDIG----
Aleca AEVVAKG-----
Oxyma ADVVAKAVFGVLIWAIANESRLESEKGLLW-----
Pyr1u ADVVAKAVFGVLIWAIAGKSDEEEKNGLLG-----
Octan ADIIAKAGFGVLIYMIAMKSEDTNDSIKTAVPAE----
KB13 ADVVAKALFGVMIYMIQAKSDAGA-----
Salru ADVLAKAGYGVLIYNIKAKSEBEGFNVMSEMPATASA
      * : : * * * * *

```

**Fig. S6.** Alignment of rhodopsin from dinoflagellates and bacteria. AP1, Avery Point clone AP-cDNA38 (GenBank accession number GU553957); AP2, AP\_1061048708262 (GU554267); Aleca, *Alexandrium catenella* (EX456621); Oxyma, *Oxtyrrhis marina* (ABV22432); Pyr1u, *Pyrocystis lunula* (AAO14677); Octan, *Octadecabacter antarcticus* (YP\_002630106); KB13, beta proteobacterium KB13 (YP\_002664979); Salru, *Salinibacter ruber* DSM 13855 (YP\_445623). The pink highlight shows the 22 residues in the retinal-binding pocket, and the blue triangle points at the proton donor residue, which is glutamic acid (E) or aspartic acid (D) for ion pump rhodopsin and other residues in sensory rhodopsin (1).

1. Jung K-H (2007) The distinct signaling mechanisms of microbial sensory rhodopsins in Archaea, Eubacteria and Eukarya. *Photochem Photobiol* 83:63–69.

**Table S1.** DinoSL-containing sequences from CAMERA database that had matches to documented genes in GenBank database

| Sequence name           | Sequence description                                                           | Sequence length | Hit accession no. | E value              | Similarity, % |
|-------------------------|--------------------------------------------------------------------------------|-----------------|-------------------|----------------------|---------------|
| JCVI_READ_1108839778669 | DinoSL only, vector seq at 5' end                                              | 974             | AJ606472          | 4.33e <sup>-37</sup> | 98            |
| JCVI_READ_2004228       | Similar to <i>Heterocapsa arctica</i> spliced-leader (SL) RNA in SL-5S cluster | 1014            | FJ434749          | 9.95e <sup>-14</sup> | 91            |
| JCVI_READ_1178274       | <i>H. arctica</i> (SL)X kind                                                   | 994             | FJ434743          | 9.75e <sup>-14</sup> | 98            |
| JCVI_READ_1222459       | Dino SL-5S cluster, similar to Kbr but without U6                              | 1014            | FJ434801          | 9.93e <sup>-52</sup> | 94            |
| JCVI_READ_2030933       | DinoSL RNA                                                                     | 1000            | XM_001868438      | 8.60e <sup>-21</sup> | 67            |
| JCVI_READ_1920381       | Kve SL RNA kind                                                                | 1048            | EF143079          | 3.84e <sup>-19</sup> | 98            |
| JCVI_READ_2019721       | SL followed by a small piece of 18S seq                                        | 927             | EU793415          | 3.37e <sup>-57</sup> | 97            |
| JCVI_READ_1306868       | Dino RP s30 with SL                                                            | 1046            | EU153194          | 1.52e <sup>-11</sup> | 83            |
| JCVI_READ_678516        | Dino 28S-SL cluster                                                            | 1051            | EU795185          | 0                    | 84            |
| JCVI_READ_1095516037741 | Two units of SL RNA, similar to Kve SL RNA                                     | 1013            | EF143079          | 2.85e <sup>-14</sup> | 90            |
| JCVI_READ_1095515504143 | Kve SL RNA kind                                                                | 959             | EF143079          | 9.39e <sup>-14</sup> | 91            |
| JCVI_READ_1092404076874 | Dino 28S-SL cluster                                                            | 1219            | EU795185          | 0                    | 84            |
| JCVI_READ_1092405883731 | Dino SL-5S cluster, without U6                                                 | 1126            | FJ434806          | 7.97e <sup>-41</sup> | 89            |
| JCVI_READ_1105430289187 | Dino5S-SL, without U6                                                          | 1148            | AY305326          | 1.19e <sup>-38</sup> | 89            |
| JCVI_READ_1095516111160 | Kve SL RNA kind, reverse                                                       | 1022            | EF143079          | 2.87e <sup>-14</sup> | 91            |
| JCVI_READ_1092347070402 | Dino 28S-SL cluster                                                            | 1132            | EU795185          | 0                    | 81            |
| JCVI_READ_1092351000339 | DinoSL only, unknown                                                           | 1145            | GQ178071          | 5.90e <sup>-11</sup> | 92            |



**Table S2. Base composition of the three e-cDNA libraries**

|     |          | A               | T               | C               | G               | GC              |
|-----|----------|-----------------|-----------------|-----------------|-----------------|-----------------|
| ML1 | Dino hit | 0.2314 ± 0.0379 | 0.2233 ± 0.0236 | 0.2497 ± 0.0287 | 0.2994 ± 0.0195 | 0.5491 ± 0.0358 |
|     | No hit   | 0.2207 ± 0.0399 | 0.2239 ± 0.0325 | 0.2550 ± 0.0299 | 0.3081 ± 0.0293 | 0.5631 ± 0.0380 |
|     | Total    | 0.2242 ± 0.0366 | 0.2232 ± 0.0296 | 0.2531 ± 0.0283 | 0.3055 ± 0.0268 | 0.5586 ± 0.0381 |
| ML2 | Dino hit | 0.2361 ± 0.0383 | 0.2224 ± 0.0255 | 0.2444 ± 0.0231 | 0.3013 ± 0.0200 | 0.5457 ± 0.0302 |
|     | No hit   | 0.2242 ± 0.0385 | 0.2207 ± 0.0377 | 0.2531 ± 0.0320 | 0.3079 ± 0.0284 | 0.5610 ± 0.0432 |
|     | Total    | 0.2288 ± 0.0365 | 0.2204 ± 0.0317 | 0.2517 ± 0.0283 | 0.3048 ± 0.0257 | 0.5566 ± 0.0389 |
| LIS | Dino hit | 0.2290 ± 0.0401 | 0.2008 ± 0.0360 | 0.2621 ± 0.0337 | 0.3132 ± 0.0332 | 0.5753 ± 0.0509 |
|     | No hit   | 0.2418 ± 0.0558 | 0.2241 ± 0.0478 | 0.2453 ± 0.0415 | 0.3112 ± 0.0434 | 0.5565 ± 0.0613 |
|     | Total    | 0.2373 ± 0.0457 | 0.2136 ± 0.0427 | 0.2540 ± 0.0371 | 0.3086 ± 0.0382 | 0.5625 ± 0.0558 |

**Table S3. Twenty-two common genes with the five most highly expressed shaded**

| Genes                                                    | ML1    |       | ML2    |       | AVPT   |       |
|----------------------------------------------------------|--------|-------|--------|-------|--------|-------|
|                                                          | contig | Total | contig | Total | contig | Total |
| ADP ribosylation factor                                  | 0      | 4     | 0      | 3     | 0      | 1     |
| ATP synthase                                             | 0      | 3     | 0      | 6     | 0      | 4     |
| Calmodulin                                               | 0      | 7     | 1(2)   | 7     | 0      | 19    |
| Centrin/caltractin                                       | 1(2)   | 7     | 1(2)   | 6     | 4(8)   | 24    |
| Mutant xylanase from <i>Streptomyces olivaceoviridis</i> | 0      | 1     | 0      | 1     | 1(2)   | 4     |
| Cyclophilin-like protein                                 | 0      | 2     | 1(3)   | 3     | 0      | 3     |
| Cytochrome c                                             | 0      | 3     | 0      | 2     | 0      | 1     |
| 14-3-3                                                   | 2(5)   | 5     | 0      | 5     | 0      | 15    |
| Dynein light chain                                       | 0      | 2     | 0      | 6     | 0      | 5     |
| Fumarate reductase                                       | 0      | 2     | 0      | 4     | 0      | 5     |
| GST                                                      | 1(2)   | 4     | 0      | 1     | 0      | 1     |
| Major basic nuclear protein                              | 0      | 14    | 1(2)   | 10    | 6(12)  | 44    |
| Peptidyl-prolyl <i>cis-trans</i> isomerase fkbp-type     | 0      | 3     | 0      | 1     | 0      | 3     |
| Peroxiredoxin                                            | 0      | 1     | 0      | 1     | 0      | 1     |
| Fucoxanthin chlorophyll <i>a/c</i> -binding protein      | 2(6)   | 10    | 1(2)   | 2     | 0      | 1     |
| Ribosomal protein: 40sRPS13                              | 0      | 1     | 0      | 1     | 0      | 1     |
| Ribosomal protein: 40sRPS17                              | 0      | 3     | 0      | 3     | 0      | 3     |
| Ribosomal protein: 60sRPL41                              | 0      | 4     | 1(2)   | 5     | 2(2)   | 12    |
| Small nuclear ribonucleoprotein                          | 1(2)   | 8     | 0      | 1     | 0      | 3     |
| Translation initiation factor 5a                         | 0      | 1     | 1(2)   | 3     | 0      | 4     |
| Ubiquitin family protein                                 | 2(20)  | 26    | 2(18)  | 30    | 0      | 7     |
| NA_nseq contig93                                         | 0      | 1     | 0      | 1     | 0      | 1     |

The numbers of clones contributing to the contig are shown in parentheses.

**Table S4. Cytoplasmic RPs identified in this study from DinoSL-based e-cDNAs and the largely unannotated dinoflagellate EST datasets (DinoEST) compared with homologs in general eukaryotes, humans, and *Plasmodium* (closest relative of dinoflagellates)**

| Type  | Eukaryotes | Humans | <i>Plasmodium falciparum</i> | ML and AP samples     |                               | DinoEST*              |                             |                             |
|-------|------------|--------|------------------------------|-----------------------|-------------------------------|-----------------------|-----------------------------|-----------------------------|
|       |            |        |                              | Clone no.             | BLASTX NR min. <i>E</i> value | Clone no.             | TBLASTN min. <i>E</i> value | TBLASTN max. <i>E</i> value |
| 40S   | RPSA       | RPSA   | RPSA                         |                       |                               | 6                     | 3.00e <sup>-75</sup>        | 7.00e <sup>-13</sup>        |
|       | RPS2       | RPS2   | RPS2                         |                       |                               | 4                     | 9.00e <sup>-76</sup>        | 2.00e <sup>-11</sup>        |
|       | RPS3       | RPS3   | RPS3                         |                       |                               | 5                     | 3.00e <sup>-96</sup>        | 4.00e <sup>-20</sup>        |
|       | RPS3A      | RPS3A  | RPS3A                        | 1                     | 4.29e <sup>-087</sup>         | 8                     | 2.00e <sup>-077</sup>       | 5.00e <sup>-24</sup>        |
|       | RPS4       | RPS4X  | RPS4                         | 2                     | 2.10e <sup>-103</sup>         | 15                    | 2.00e <sup>-096</sup>       | 4.00e <sup>-27</sup>        |
|       |            | RPS4Y  |                              |                       |                               |                       |                             |                             |
|       | RPS5       | RPS5   | RPS5                         | 1                     | 1.02e <sup>-083</sup>         | 9                     | 2.00e <sup>-086</sup>       | 2.00e <sup>-14</sup>        |
|       | RPS6       | RPS6   | RPS6                         | 2                     | 1.24e <sup>-077</sup>         | 13                    | 7.00e <sup>-081</sup>       | 2.00e <sup>-19</sup>        |
|       | RPS7       | RPS7   | RPS7                         | 2                     | 1.81e <sup>-057</sup>         | 6                     | 2.00e <sup>-082</sup>       | 6.00e <sup>-21</sup>        |
|       | RPS8       | RPS8   | RPS8                         | 3                     | 9.97e <sup>-065</sup>         | 8                     | 2.00e <sup>-084</sup>       | 2.00e <sup>-19</sup>        |
|       | RPS9       | RPS9   | RPS9                         | 1                     | 1.31e <sup>-068</sup>         | 6                     | 4.00e <sup>-079</sup>       | 5.00e <sup>-40</sup>        |
|       | RPS10      | RPS10  | RPS10                        | 1                     | 1.52e <sup>-044</sup>         | 1                     | 3.00e <sup>-047</sup>       | 3.00e <sup>-047</sup>       |
|       | RPS11      | RPS11  | RPS11                        | 2                     | 1.55e <sup>-060</sup>         | 17                    | 2.00e <sup>-079</sup>       | 9.00e <sup>-27</sup>        |
|       | RPS12      | RPS12  | RPS12                        | 4                     | 6.81e <sup>-047</sup>         | 10                    | 7.00e <sup>-043</sup>       | 2.00e <sup>-14</sup>        |
|       | RPS13      | RPS13  | RPS13                        | 3                     | 1.58e <sup>-071</sup>         | 4                     | 4.00e <sup>-075</sup>       | 1.00e <sup>-61</sup>        |
|       | RPS14      | RPS14  | RPS14                        |                       |                               | 6                     | 6.00e <sup>-53</sup>        | 1.00e <sup>-13</sup>        |
|       | RPS15      | RPS15  | RPS15                        | 2                     | 3.23e <sup>-051</sup>         | 11                    | 1.00e <sup>-061</sup>       | 1.00e <sup>-34</sup>        |
|       | RPS15A     | RPS15A | RPS15A                       | 1                     | 1.96e <sup>-052</sup>         | 4                     | 3.00e <sup>-057</sup>       | 5.00e <sup>-35</sup>        |
|       | RPS16      | RPS16  | RPS16                        | 2                     | 5.55e <sup>-056</sup>         | 1                     | 1.00e <sup>-047</sup>       | 1.00e <sup>-047</sup>       |
|       | RPS17      | RPS17  | RPS17                        | 5                     | 2.42e <sup>-050</sup>         | 10                    | 5.00e <sup>-043</sup>       | 5.00e <sup>-28</sup>        |
|       | RPS18      | RPS18  | RPS18                        | 1                     | 2.46e <sup>-050</sup>         | 7                     | 1.00e <sup>-066</sup>       | 5.00e <sup>-15</sup>        |
|       | RPS19      | RPS19  | RPS19                        | 1                     | 6.10e <sup>-041</sup>         | 6                     | 9.00e <sup>-046</sup>       | 1.00e <sup>-18</sup>        |
|       | RPS20      | RPS20  | RPS20                        |                       |                               | 11                    | 5.00e <sup>-47</sup>        | 1.00e <sup>-18</sup>        |
|       | RPS21      | RPS21  | RPS21                        | 5                     | 9.83e <sup>-033</sup>         | 1                     | 8.00e <sup>-033</sup>       | 8.00e <sup>-033</sup>       |
|       | RPS23      | RPS23  | RPS23                        | 5                     | 5.44e <sup>-068</sup>         | 12                    | 1.00e <sup>-075</sup>       | 7.00e <sup>-19</sup>        |
|       | RPS24      | RPS24  | RPS24                        | 1                     | 4.26e <sup>-044</sup>         | 6                     | 3.00e <sup>-045</sup>       | 2.00e <sup>-33</sup>        |
|       | RPS25      | RPS25  | RPS25                        | 2                     | 6.99e <sup>-043</sup>         | 18                    | 3.00e <sup>-045</sup>       | 9.00e <sup>-19</sup>        |
|       | RPS26      | RPS26  | RPS26                        | 2                     | 2.41e <sup>-039</sup>         | 6                     | 3.00e <sup>-040</sup>       | 2.00e <sup>-26</sup>        |
|       | RPS27      | RPS27  | RPS27                        | 5                     | 3.41e <sup>-035</sup>         | 6                     | 7.00e <sup>-040</sup>       | 1.00e <sup>-18</sup>        |
|       | RPS27A     | RPS27A | RPS27A                       |                       |                               | 11                    | 3.00e <sup>-25</sup>        | 4.00e <sup>-12</sup>        |
| RPS28 | RPS28      | RPS28  | 2                            | 4.46e <sup>-017</sup> | 8                             | 4.00e <sup>-025</sup> | 6.00e <sup>-16</sup>        |                             |
| RPS29 | RPS29      | RPS29  | 2                            | 6.09e <sup>-014</sup> | 4                             | 9.00e <sup>-014</sup> | 2.00e <sup>-11</sup>        |                             |
| RPS30 | RPS30      | RPS30  | 4                            | 2.12e <sup>-027</sup> | 2                             | 1.00e <sup>-019</sup> | 7.00e <sup>-14</sup>        |                             |
| 60S   | RPL3       | RPL3   | RPL3                         |                       |                               | 17                    | 1.00e <sup>-103</sup>       | 6.00e <sup>-16</sup>        |
|       | RPL4       | RPL4   | RPL4                         |                       |                               | 5                     | 8.00e <sup>-92</sup>        | 5.00e <sup>-40</sup>        |
|       | RPL5       | RPL5   | RPL5                         |                       |                               | 11                    | 1.00e <sup>-89</sup>        | 5.00e <sup>-28</sup>        |
|       | RPL6       | RPL6   | RPL6                         | 1                     | 2.24e <sup>-039</sup>         | 2                     | 2.00e <sup>-045</sup>       | 2.00e <sup>-40</sup>        |
|       | RPL7       | RPL7   | RPL7                         |                       |                               | 7                     | 9.00e <sup>-52</sup>        | 3.00e <sup>-17</sup>        |
|       | RPL7A      | RPL7A  | RPL7A                        |                       |                               | 12                    | 4.00e <sup>-71</sup>        | 1.00e <sup>-21</sup>        |
|       | RPL8       | RPL8   | RPL8                         | 1                     | 3.84e <sup>-053</sup>         | 6                     | 4.00e <sup>-054</sup>       | 2.00e <sup>-26</sup>        |
|       | RPL9       | RPL9   | RPL9                         |                       |                               | 6                     | 8.00e <sup>-65</sup>        | 1.00e <sup>-38</sup>        |
|       | RPL10      | RPL10  | RPL10                        | 3                     | 1.88e <sup>-084</sup>         | 5                     | 4.00e <sup>-088</sup>       | 2.00e <sup>-46</sup>        |
|       | RPL10A     | RPL10A | RPL10A                       |                       |                               | 4                     | 6.00e <sup>-44</sup>        | 9.00e <sup>-22</sup>        |
|       | RPL11      | RPL11  | RPL11                        | 2                     | 1.79e <sup>-070</sup>         | 9                     | 5.00e <sup>-077</sup>       | 5.00e <sup>-49</sup>        |
|       | RPL12      | RPL12  | RPL12                        | 1                     | 8.10e <sup>-060</sup>         | 8                     | 9.00e <sup>-060</sup>       | 3.00e <sup>-54</sup>        |
|       | RPL13      | RPL13  | RPL13                        |                       |                               | 6                     | 4.00e <sup>-62</sup>        | 2.00e <sup>-29</sup>        |
|       | RPL13A     | RPL13A | RPL13A                       |                       |                               | 7                     | 9.00e <sup>-69</sup>        | 8.00e <sup>-14</sup>        |
|       | RPL14      | RPL14  | RPL14                        |                       |                               | 6                     | 2.00e <sup>-26</sup>        | 2.00e <sup>-12</sup>        |
|       | RPL15      | RPL15  | RPL15                        | 2                     | 4.72e <sup>-080</sup>         | 3                     | 1.00e <sup>-054</sup>       | 3.00e <sup>-32</sup>        |
|       | RPL17      | RPL17  | RPL17                        | 1                     | 3.42e <sup>-48</sup>          | 6                     | 6.00e <sup>-83</sup>        | 3.00e <sup>-28</sup>        |
|       | RPL18      | RPL18  | RPL18                        |                       |                               | 4                     | 5.00e <sup>-48</sup>        | 1.00e <sup>-39</sup>        |
|       | RPL18A     | RPL18A | RPL18A                       |                       |                               | 9                     | 7.00e <sup>-54</sup>        | 6.00e <sup>-26</sup>        |
|       | RPL19      | RPL19  | RPL19                        |                       |                               | 10                    | 1.00e <sup>-46</sup>        | 3.00e <sup>-18</sup>        |
|       | RPL21      | RPL21  | RPL21                        | 4                     | 1.00e <sup>-069</sup>         | 4                     | 2.00e <sup>-074</sup>       | 9.00e <sup>-43</sup>        |
|       | RPL22      | RPL22  | RPL22                        | 2                     | 2.65e <sup>-021</sup>         | 6                     | 3.00e <sup>-019</sup>       | 8.00e <sup>-16</sup>        |
|       | RPL23      | RPL23  | RPL23                        | 3                     | 9.76e <sup>-047</sup>         | 13                    | 3.00e <sup>-053</sup>       | 3.00e <sup>-21</sup>        |
|       | RPL23A     | RPL23A | RPL23A                       | 3                     | 4.34e <sup>-041</sup>         | 3                     | 6.00e <sup>-039</sup>       | 1.00e <sup>-16</sup>        |
|       | RPL24      | RPL24  | RPL24                        |                       |                               | 9                     | 2.00e <sup>-22</sup>        | 4.00e <sup>-10</sup>        |
|       | RPL26      | RPL26  | RPL26                        | 2                     | 4.58e <sup>-055</sup>         | 12                    | 8.00e <sup>-058</sup>       | 3.00e <sup>-34</sup>        |

Table S4. Cont.

| Type | Eukaryotes                                         | Humans | <i>Plasmodium falciparum</i> | ML and AP samples |                       | DinoEST*  |                       |                       |
|------|----------------------------------------------------|--------|------------------------------|-------------------|-----------------------|-----------|-----------------------|-----------------------|
|      |                                                    |        |                              | Clone no.         | value                 | Clone no. | TBLASTN min. <i>E</i> | TBLASTN max. <i>E</i> |
|      | RPL27                                              | RPL27  |                              |                   |                       | 4         | 2.00e <sup>-24</sup>  | 3.00e <sup>-11</sup>  |
|      | RPL27A                                             | RPL27A | RPL27A                       | 2                 | 4.84e <sup>-051</sup> | 5         | 3.00e <sup>-046</sup> | 2.00e <sup>-11</sup>  |
|      | RPL28                                              | RPL28  |                              | 2                 | 2.94e <sup>-008</sup> | 3         | 1.00e <sup>-027</sup> | 2.00e <sup>-23</sup>  |
|      | RPL29                                              | RPL29  | RPL29                        | 3                 | 3.93e <sup>-013</sup> | 2         | 1.00e <sup>-004</sup> | 4.00e <sup>-03</sup>  |
|      | RPL30                                              | RPL30  | RPL30                        | 2                 | 9.77e <sup>-040</sup> | 3         | 1.00e <sup>-049</sup> | 5.00e <sup>-38</sup>  |
|      | RPL31                                              | RPL31  | RPL31                        | 3                 | 3.18e <sup>-037</sup> | 5         | 1.00e <sup>-036</sup> | 3.00e <sup>-16</sup>  |
|      | RPL32                                              | RPL32  | RPL32                        | 1                 | 1.02e <sup>-055</sup> | 4         | 6.00e <sup>-058</sup> | 2.00e <sup>-32</sup>  |
|      | RPL34                                              | RPL34  | RPL34                        | 3                 | 1.35e <sup>-034</sup> | 11        | 8.00e <sup>-043</sup> | 4.00e <sup>-32</sup>  |
|      | RPL35                                              | RPL35  | RPL35                        | 1                 | 1.76e <sup>-041</sup> | 9         | 1.00e <sup>-051</sup> | 2.00e <sup>-30</sup>  |
|      | RPL35A                                             | RPL35A | RPL35A                       | 1                 | 5.88e <sup>-036</sup> | 7         | 3.00e <sup>-041</sup> | 2.00e <sup>-18</sup>  |
|      | RPL36                                              | RPL36  | RPL36                        | 2                 | 2.06e <sup>-022</sup> | 4         | 4.00e <sup>-036</sup> | 1.00e <sup>-25</sup>  |
|      | RPL36A                                             | RPL36A | RPL36A                       | 2                 | 2.14e <sup>-043</sup> | 9         | 6.00e <sup>-026</sup> | 1.00e <sup>-06</sup>  |
|      | RPL37                                              | RPL37  | RPL37 <sup>‡</sup>           | 1                 | 4.40e <sup>-025</sup> | 1         | 4.40e <sup>-025</sup> | 4.40e <sup>-025</sup> |
|      |                                                    |        | XM_00280871<br>6.1           |                   |                       |           |                       |                       |
|      | RPL37A                                             | RPL37A | RPL37A                       | 2                 | 2.70e <sup>-030</sup> | 3         | 9.00e <sup>-030</sup> | 1.00e <sup>-26</sup>  |
|      | RPL38                                              | RPL38  | RPL38                        | 2                 | 1.22e <sup>-022</sup> | 3         | 3.00e <sup>-032</sup> | 5.00e <sup>-26</sup>  |
|      | RPL39                                              | RPL39  | RPL39                        | 2                 | 3.51e <sup>-014</sup> | 8         | 4.00e <sup>-021</sup> | 4.00e <sup>-11</sup>  |
|      | RPL40                                              | RPL40  | RPL40                        |                   |                       | 3         | 1.00e <sup>-24</sup>  | 1.00e <sup>-15</sup>  |
|      | RPL41                                              | RPL41  | RPL41                        | 21                | 1.40e <sup>-1</sup>   | 20        | 4.00e <sup>-6</sup>   | 1.80E0                |
|      | RPLP0                                              | RPLP0  | RPLP0                        |                   |                       | 6         | 1.00e <sup>-65</sup>  | 3.00e <sup>-10</sup>  |
|      | RPLP1                                              | RPLP1  | RPLP1                        | 1                 | 2.74e <sup>-011</sup> | 7         | 1.00e <sup>-017</sup> | 6.00e <sup>-11</sup>  |
|      | RPLP2                                              | RPLP2  | RPLP2                        |                   |                       | 4         | 2.00e <sup>-16</sup>  | 6.00e <sup>-11</sup>  |
|      | RPLP3 <sup>‡</sup>                                 |        |                              |                   |                       |           |                       |                       |
|      | ubiquitin-40S RP s27a fusion protein               |        |                              | 1                 | 7.85e <sup>-024</sup> | 8         | 6.00e <sup>-042</sup> | 2.00e <sup>-22</sup>  |
|      | ubiquitin a-52 residue 60S RP L40 fusion product 1 |        |                              | 4                 | 9.54e <sup>-064</sup> | 2         | 1.00e <sup>-069</sup> | 5.00e <sup>-68</sup>  |

Our analysis led to recognition (annotation) of the RPs in DinoEST; their GenBank accession numbers are listed below. \* Yellow shading indicates using human RPs as query to TBLASTX against DinoEST. Red shading indicates using e-cDNA RPs as query to TBLASTX against DinoEST.

\*GenBank accession numbers are shown below; for each RP, only the numbers of four sequences with the lowest *E* values are listed if there are more than four ESTs for that RP. **RPSA**: FE864067, EX461873, BP743535, FE864066; **RPS2**: EC162856, CK431500, EC152673, EC151729; **RPS3**: FE865686, EC160912, FE866030, CK784647; **RPS3A**: EX455617, CF066398, CF947809, EC156761; **RPS4**: CK786168, EC158151, EH036413, EH036412; **RPS5**: EX457652, EX463114, CK784712, GH268618; **RPS6**: GH269191, EC160198, DT386052, EC159409; **RPS7**: CK432698, CK783935, GH268589, BP743274; **RPS8**: EC160948, DW521132, GH268872, FE866078; **RPS9**: EC158991, EC156985, EC158218, BP742809; **RPS10**: CK783051; **RPS11**: DT385176, DT384597, EC154239, DT383171; **RPS12**: BP743751, CV554530, CK784123, CK432343; **RPS13**: CK782830, EC158941, CF948301, GH268607; **RPS14**: BP743861, CF947800, CK783890, CK431919; **RPS15**: CV554514, BP743080, CF947222, CK433056; **RPS15A**: EC156350, GH269011, CK431507, CF774661; **RPS16**: BP742940; **RPS17**: GH268571, GH268763, CK433224, CK785088; **RPS18**: BP743927, CK785635, CK432110, CK783557; **RPS19**: BP743382, EC162454, FK837667, FK838016; **RPS20**: GH269372, GH268829, EC156542, EC156167; **RPS21**: GH268630; **RPS23**: CF774669, CF774806, CF774847, CK433302; **RPS24**: CF947421, CF774746, EC151791, EC151847; **RPS25**: CK783795, EC163406, FK840398, FK851840; **RPS26**: EC152487, CK783891, GH268590, GH268581; **RPS27**: CK786492, GH268908, GH268622, CF067408; **RPS27A**: DT381620, FE537684, FE537685, DT380994; **RPS28**: GH269315, GH268787, GH269153, GH268848; **RPS29**: BP742738, GH268753, GH268762, GH268702; **RPS30**: CX769323, GH268588; **RPL3**: GH269008, EX956894, EX461586, EC160738; **RPL4**: EH037153, EX463676, EX457268, EX457915; **RPL5**: FE865567, CO061119, EX458933, EX459366; **RPL6**: CF948038, GH269328; **RPL7**: CF947136, EH037881, CF065757, EX974297; **RPL7A**: CO063265, FK838432, BP743582, DT383545; **RPL8**: DT386043, DT386057, DT385059, CO062061; **RPL9**: CO062246, GH268886, GH268796, CK784747; **RPL10**: EC161569, CF064579, CK783127, FE865570; **RPL10A**: BP742861, EX459988, CK785294, EC158490; **RPL11**: GH268621, GH268610, CV553999, GH268975, GH268766, GH268625, GH268611; **RPL12**: EX461930, EX463061; **RPL13**: EH036222, EH036221, EH036220, GH268718; **RPL13A**: CF774794, EX457703, CV554811, GH269151; **RPL14**: EX458152, EC151394, GH268754, GH268701; **RPL15**: EH037984, CF751928, CX769720; **RPL17**: CF065070, EC159932, CK433848, GH268723; **RPL18**: CK784947, GH268606, GH268613, EC153742; **RPL18A**: FE538803, FE538804, CX769516, EC154473; **RPL19**: CF774731, GH268585, GH268599, CK784098; **RPL21**: EC153462, EC153222, CK432491, CK432500; **RPL32**: BP742874, CK433733, GH268656, GH268582; **RPL34**: CK783091, GH269113, GH268839, EX872312; **RPL35**: EX463411, EC152100, DT382207, DT381939; **RPL35A**: GH269005, EX962215; **RPL36**: CK433240; **RPL36A**: DT383609, DT381630, DT381982, DT382489; **RPL36A**: GH268938, EC155427, EC150961, CK782483; **RPL37**: HQ110606; **RPL37A**: GH268817, CK782481, CK783858; **RPL38**: BP742980, DT382039, DT381465; **RPL39**: BP744199, GH268893, GH268604, GH268608; **RPL40**: CK784763, DT381149, DT380194; **RPL41**: GW795931, EX969058, GH269000, DQ864954; **RPLP0**: EX865562, EX865561, EX462251, GH269218; **RPLP1**: GH268619, BP742916, EX878504, CK433864; **RPLP2**: FE864820, CK433635, CF774573, CV554102; **ubiquitin-RPS27a fusion protein**: EC159986, GH268901, EC155299, GH269319; **ubiquitin-RPL40 fusion product**: BP744060, CV554507.

<sup>‡</sup>Only documented in plants.

<sup>‡</sup>Not listed as existing in *Plasmodium falciparum* in the RP database (<http://ribosome.med.miyazaki-u.ac.jp/>) but is in GenBank.
